# Supplementary material
Source: Springer Nature journal article supplement (https://www.springermedizin.de/resource/supplementary/12943_2014_1312_MOESM9_ESM.pdf/9552674)
Supplement: MOESM9 [file 9552674]

Table 2. Up-regulated and down-regulated snoRNAs in TICs vs. non-TICs of primary lung tumor tissues.

| Name of snoRNA | Fold-change (TICs/non-TICs) | p. Value |
|----------------|-----------------------------|----------|
| SNORA42        | 4.383                       | 0.00117  |
| SNORA3         | 4.144                       | 0.00010  |
| SNORA61        | 3.893                       | 0.00010  |
| SNORD14E       | 3.733                       | 0.00021  |
| SNORA62        | 3.600                       | 0.00035  |
| SNORD78        | 3.538                       | 0.00874  |
| SNORD44        | 3.505                       | 0.00084  |
| SNORD76        | 3.503                       | 0.00001  |
| SNORD73B       | 3.468                       | 0.00006  |
| SNORA18        | 3.456                       | 0.00199  |
| SNORD38B       | 3.430                       | 0.00066  |
| SNORD96A       | 3.405                       | 0.00043  |
| SNORD36C       | 3.387                       | 0.00079  |
| SNORD66        | 3.367                       | 0.00005  |
| SNORD83B       | 3.362                       | 0.00029  |
| SNORD88A       | 3.326                       | 0.00003  |
| SNORD110       | 3.303                       | 0.00058  |
| SNORD34        | 3.206                       | 0.00105  |
| SNORD33        | 3.169                       | 0.00031  |
| SNORD1C        | 3.055                       | 0.00005  |
| SNORD55        | 3.005                       | 0.00130  |
| SNORD116-26    | -3.052                      | 0.00505  |

TICs, tumor-initiating cells; non-TICs, non-tumor-initiating cells.

TICs were ALDH1 cells purified by Aldefluor assay.
